# Maternal High Fiber Diet Protects Offspring Against Type 2 Diabetes

Huishi Toh<sup>1,\*</sup>, James A. Thomson<sup>2,3,4</sup>, Peng Jiang<sup>4,\*</sup>

<sup>1</sup> Neuroscience Research Institute, University of California Santa Barbara, Santa Barbara, CA, USA

<sup>2</sup> Department of Molecular, Cellular and Developmental Biology, University of California Santa Barbara, Santa Barbara, CA, USA

<sup>3</sup> Department of Cell and Regenerative Biology, University of Wisconsin School of Medicine and Public Health, Madison, WI, USA

<sup>4</sup> Regenerative Biology Laboratory, Morgridge Institute for Research, Madison, WI, USA

## **\*To whom correspondence should be addressed**

Huishi Toh ([toh@ucsb.edu](mailto:toh@ucsb.edu))

Peng Jiang ([PJiang@morgridge.org](mailto:PJiang@morgridge.org))

## **Abstract**

Previous studies have reported that maternal malnutrition is linked to increased risk of developing type 2 diabetes in adulthood. Although several diabetic risk factors associated with early life environment have been identified, protective factors remain elusive. Here, we modulate the early life environment using a maternal high fiber diet to investigate whether the offspring are protected from type 2 diabetes. We examined the interplay between early life environment (maternal diet) and later life environment (offspring diet) using a longitudinal study with 671 Nile rats. We found that exposure to a high fiber maternal diet prior to weaning significantly lowers the risk of diet-induced diabetes in the offspring. Interestingly, offspring consuming a high fiber diet after weaning do not get diet-induced diabetes, even when exposed to a diabetogenic maternal diet. Here, we provide the first evidence that the protective effect of high fiber can be transmitted to the offspring through a maternal diet, which has important implications in diabetes prevention.

## **Abbreviation**

Random blood glucose (RBG)

## Introduction

Diabetes is one of the fastest growing health challenges facing us today. In the last 20 years, the number of people living with diabetes increased from 151 million to over 463 million (1); of those, 90–95% have type 2 diabetes. Type 2 diabetes is a complex disease that is poorly understood. It is characterized by insulin resistance exacerbated by beta cell dysfunction. Lifestyle intervention and current medications including insulin therapy can help regulate blood glucose levels but, in the vast majority of patients, these regimens ultimately fail. Consequently, even with treatment, diabetic patients continue to be at risk for numerous debilitating complications and have approximately a two-fold increased mortality compared to people without diabetes (2). Hence, prevention of diabetes is a top public health priority around the world.

Diabetic risk is strongly associated with both parental history and eating habits. The odds of developing type 2 diabetes is three- to six-fold higher for adults with at least one diabetic parent compared to adults without diabetic parents (3). However, genome-wide association studies repeatedly reveal that genetic factors insufficiently explain the observed familial aggregation (4; 5), suggesting that familial risk is also modulated by nongenetic factors, which might include learned eating behaviors (6; 7) as well as exposure to early life environment (8). The culpability of diet is well known but not well defined. All three classes of macronutrients – carbohydrate, fat, and protein – have been examined quantitatively and qualitatively in the context of type 2 diabetes, but consensus is sorely lacking. In general, newer studies have proposed that a low-carbohydrate diet could be more effective for managing type 2 diabetes

compared to a low-fat diet (9; 10). However, fiber is an exception, unlike simple carbohydrates, fiber is a member of the carbohydrate food group that is associated with a reduced risk of developing type 2 diabetes (11).

Low birth and one-year-old weights are strongly linked to type 2 diabetes later in life (12). Based on this observation, Hales and Barker developed the thrifty phenotype hypothesis, which states that poor nutrition during early developmental stages may result in a reduced growth of beta cells, resulting in a physiology well adapted to poor nutrition in later life. However, a switch to improved nutrition in such individuals would lead to the development of type 2 diabetes (13). Evidence supporting the thrifty phenotype hypothesis comes from examining the offspring of pregnant mothers during the Dutch famine (maladapted to improved nourishment) and the Siege of Leningrad (correctly adapted to malnourishment) (14). A decade later, Bateson and Gluckman further elaborated on this phenomenon using the predictive adaptive response hypothesis where the phenotypic plasticity during early development confers an advantage if the future environment matches the predicted environment based on early life exposures (15). Previous experimental animal studies have similarly demonstrated adverse long-term effects using a maternal malnourished model, frequently using a low protein (in association with higher fat or carbohydrate) diet during gestation and lactation in sheep, pigs, and rodents (16-19). However, research to date has focused on the impact of maternal diet in increasing disease susceptibility rather than decreasing the susceptibility to type 2 diabetes. Here, using the Nile rats (*Arvicanthis Niloticus*) as a model, we explore the consequence of two opposing maternal diets in shifting the subsequent susceptibility of type 2 diabetes in the offspring.

We conducted a longitudinal study of 671 Nile rats to investigate how early life environment affects the offspring's diabetic susceptibility through the maternal diet. Current laboratory Nile rats are descendants of wild Nile rats trapped in 1993 from the Masai Mara National Reserve in Kenya (20). They were originally brought to the United States as a rare diurnal rodent species to study biological rhythms, but surprisingly, the laboratory Nile rats had a high incidence of type 2 diabetes. The Nile rat presents a similar nutritional etiology and disease progression to type 2 diabetes in humans (21-24). In its natural habitat, Nile rats consume a low energy, high fiber diet such as grass stems and do not develop diet-induced diabetes (25). However, in captivity, when they eat a high energy, low fiber diet, they become diabetic, and eventually develop human-like long-term diabetic complications such as diabetic retinopathy (26). In the lifelong susceptibility of type 2 diabetes, both exposure to maternal nutrition and self-acquired nutrition are acting in concert. Previous experimental studies have interrogated maternal diet as an isolated variable (27; 28) but failed to incorporate offspring diet as a covariate. Additionally, we have included sex as a biological variable, acknowledging the presence of sexual dimorphism in diet-induced type 2 diabetes (29; 30). Using a simple Bayesian network, we incorporated three factors – maternal diet, offspring diet, and sex – in our statistical model to examine the probability of diabetes caused by each factor. Our aim is to provide a definitive study of how maternal diet (early life environment) juxtaposed with offspring diet (later life environment) shifts the long-term risk susceptibility and clarify the role of maternal diet in the prevention of type 2 diabetes.

## **Methods**

## Animals

All animal experiments were approved by the University of California Santa Barbara, Institutional Animal Care and Use Committee, and conducted in accord with the NIH Guide for the Care and Use of Laboratory Animals. Our founder Nile rats were derived from the Brandeis University colony of the KC Hayes Laboratory. Nile rats in UCSB are housed at 70–78°F in a conventional facility with individually ventilated cages and are provided autoclaved Sanichips as bedding material.

## Experimental Animal Protocol

Nile rat dams are randomly fed a high fiber diet (Lab Diet 5L3M; Newco Speciality, Rancho Cucamonga, CA, USA) or a diabetogenic diet (Formulab Diet 5008; Newco Speciality, Rancho Cucamonga, CA, USA) (23). Littermates are randomly assigned to either the high fiber or diabetogenic diet, maintained throughout the study. Using sibling-matched diet assignments allow us to redistribute possible genetic bias into each of the high fiber or diabetogenic diet groups. Random blood glucose (RBG) levels are measured every four weeks starting at weaning age (4 weeks old). Diabetic Nile rats are defined as having  $RBG > 100$  based on prior studies (31). To reduce adverse events from diabetic complications, Nile rats with  $RBG > 500$  were euthanized. The number of Nile rats grouped by diet scheme and sex is provided in Supplementary Figure S1, and details from each Nile rat are provided in Supplementary Table 1.

## Modeling the probability of diabetes

We used a simple Bayesian model framework (32) consisting of three variables (maternal diet, offspring diet, and sex) to model the probability of diabetes from 4 to 40 weeks at 4-week intervals (Supplementary Figure S2). The Bayesian network parameter learning and probability inference were implemented by R package (“bnlearn”) (33).

### Estimating human equivalent age of rodents

To provide human relevance, we presented in parallel the human equivalent age of rodents obtained from the Jackson Laboratory (life phases equivalencies between human and mouse) (34).

## **Results**

In a laboratory environment, Nile rats readily develop diabetes when fed a standard rodent chow (23), thereby referred to as a diabetogenic diet (specifically in the context of the Nile rat). Conversely, they do not develop diabetes when fed a high fiber diet. Both diets used are commercial diets based on their robustness to induce and prevent diet-induced diabetes in the Nile rat. In this study, longitudinal RBG measurements were used to assess the development and progression of diabetes. Methods of monitoring blood glucose involving fasting were avoided because of the potential confounding effect of regularly fasting our animals in a long-term study. More importantly, RBG has been verified to be a reliable early biomarker and a preferred clinical parameter for predicting both incidence of diabetes and its severity in the Nile rat (31).

### Offspring on diabetogenic diet were protected against diabetes when mothers consumed a high fiber diet

We observed a significant difference between the diabetogenic diet offspring from mothers that consumed a high fiber diet compared to a diabetogenic diet. As shown in Figure 1, in the group where offspring and mothers share the same diabetogenic diets, the average RBG depicts an upward trend from 4 weeks old and clearly reflects a diabetic value from 12 weeks old. The upward trend continues until around 36 weeks old, when the average RBG plateaus at around 300mg/dL. In contrast, in the group with mothers on a high fiber diet, the average RBG wavered around 100mg/dL and did not reach a diabetic value until around 28 weeks, suggesting a delay in onset of diabetes of about 16 weeks. Furthermore, with each subsequent reading at a later timepoint, the difference between the diabetogenic maternal diet group and the high fiber maternal diet group gets larger, suggesting that in addition to the delayed onset of hyperglycemia, the progression of diabetes is additionally slowed down.

### Offspring on a high fiber diet did not develop diabetes even when mothers consumed a diabetogenic diet

Interestingly, a high fiber diet conferred long-term protection of offspring against diabetes regardless of maternal diet. In offspring that were fed a high fiber diet after weaning, the average blood glucose trajectory between those that were from mothers with a high fiber diet or those that were from mothers with a diabetogenic diet were similar. The average RBG in both groups never reached the diabetic threshold of  $RBG > 100$  mg/dL, from 4 to 40 weeks old (Figure 2). This pattern was observed in both sexes (Supplementary Figure S3).



### Protective effect of the high fiber maternal diet was more pronounced in males

The blood glucose lowering effect of the maternal high fiber diet on diabetogenic diet offspring was observed in both sexes. Males benefitted more because they had a more severe hyperglycemic profile compared to the females when on a diabetogenic diet. However, the maternal high fiber diet protection lowered the mean RBG levels to a similar normal level in both male and female offspring (Figure 3).

### High fiber maternal diet reduced the long-term risk susceptibility of diet-induced diabetes

In our experimental design, we have three factors – maternal diet, offspring diet, and sex – that affect the risk susceptibility of diet-induced diabetes. To account for all three factors, we built a statistical model using a simple Bayesian network from 671 Nile rats with RBG values ranging from 4 to 40 weeks old. From our model, we calculated the probability of diabetes in diabetogenic diet offspring within the high fiber maternal diet group compared to the diabetogenic maternal diet group. As shown in Figure 4, the probability of diabetes in the diabetogenic maternal diet group increased from 28.74% at 12 weeks old (equivalent to 20 years old in a human) to 81.77% at 36 weeks old (equivalent to 38 years old in a human). In comparison, the high fiber maternal diet group increased from 13.21% at 12 weeks old to 32.87% at 36 weeks old. This data is replotted according to sex in Figure 5.

## **Discussion**

Presently, effective prevention measures are needed to curb the steep rising rate of type 2 diabetes. The susceptibility of type 2 diabetes is subjected to cumulative events throughout life, possibly starting from conception, described as a life course perspective. Early life development *in utero* and during infancy has been identified as a sensitive period of phenotypic plasticity where maternal nutrition can impact the risk susceptibility of type 2 diabetes in later life. Thus, a better understanding of how maternal diet modulates disease susceptibility would inform us on effective ways to prevent type 2 diabetes.

Here, we use two opposing diets that either induce or prevent diabetes in the Nile rat to understand how maternal nutrition shifts the disease risk of type 2 diabetes. Our experimental design is different in a few ways. First, we used a lifelong maternal diet in the Nile rat dams. In other experimental animal studies, the maternal diet is typically restricted to pregnancy and lactation. However, the influence of maternal diet could include the period of oogenesis that occurs preconception. We also considered the possibility that abruptly switching diets just prior to conception may trigger altered behavioral changes due to interrupted eating habits not pertinent to the maternal nutrition. Second, maternal diet and offspring diet were treated as two independent variables, providing us an opportunity to observe the interplay between early life nutrition prior to weaning and later life nutrition after weaning. This added layer of information that cannot be obtained from studies using maternal diet as the sole experimental variable. Additionally, we considered sex as a biological variable, versus the majority of diabetic studies in animal models where only males are represented. Third, the risk susceptibility of diet-induced diabetes was analyzed in a longitudinal manner. Diet-induced diabetes has a complicated disease profile where onset and severity are highly variable, both in the human population and the Nile

rat model. Thus, we generated a detailed longitudinal dataset to capture dynamic changes over time. Also, our dataset for this study is unusually large, consisting of RBG values from 671 Nile rats from 4 to 40 weeks old. This allows us to validate our findings using a robust Bayesian model with three nodes: maternal diet, offspring diet, and sex.

We found that a maternal high fiber diet reduces the probability of diabetes in offspring that consumed a diabetogenic diet after weaning (Figure 4). The ratio for the percentage of calories provided by carbohydrate, fat, and protein were 67:10:23 for the high fiber diet and 56:17:27 for the diabetogenic diet. Although the ratios of macronutrients were not dramatically different, the percentage of crude fiber was 23% for the high fiber diet and only 4% for the diabetogenic diet. The beneficial effect of fiber on diet-induced diabetes in the Nile rat had previously been demonstrated by Bolsinger (31). A recent epidemiological meta-analysis reports a 10–20% reduction in type 2 diabetes incidence associated with higher dietary fiber using data from 48,468 people in 17 studies (35). The observed protective effect could be due to the presence of dietary fiber that promotes an anti-diabetic microbiome by increasing the amount of short-chain fatty acid (36). Another possibility is that fiber reduces the intake calories, and the high fiber diet is essentially a low-calorie diet. Future studies using purified diets can be used to assess how dietary fiber confers protection against type 2 diabetes.

The focus of maternal diet (marker of early life environment) stems from studies on adults that lived through famines where low birth weight was consistently associated with detrimental metabolic health consequences in adult life (37). To explain these observations, the thrifty phenotype hypothesis and the predictive adaptive response hypothesis were proposed, where a mismatch between early life environment and later life environment resulted in increased

susceptibility to type 2 diabetes. However, whether it is the mismatched element or the nature of the environmental factor(s) is still controversial. A recent human study investigating different combinations of early and later life environmental conditions revealed that adverse early life conditions were detrimental to later health across all environments, not only in mismatched situations (38). Our two-by-two factorial design provided two groups with mismatched diets and two groups with matched diets. We found that Nile rats with the high fiber maternal diet and diabetogenic offspring diet had a diabetes profile that was better than Nile rats with matched diabetogenic diets but worse than Nile rats with matched high fiber diet. Furthermore, Nile rats with the diabetogenic maternal diet and high fiber offspring diet did not get diabetes, similar to Nile rats with matched high fiber diets. Therefore, our findings suggest that it is not the mismatched element that leads to type 2 diabetes; rather, it depends on the nature of the environmental cue. In the Nile rat model, a high fiber diet is beneficial to prevent diet-induced diabetes whether exposed to it through maternal feeding or consumed later in life.

In conclusion, we showed evidence that by improving early life environment, such as using a maternal high fiber diet, protective factors are transmitted to the offspring, leading to a remarkable reduction in the risk susceptibility of type 2 diabetes.

## **Acknowledgments**

The authors thank the K.C. Hayes (Brandeis University) for valuable advice on Nile rat husbandry and nutrition, and A. Freitag (Morgridge Institute for Research) for editorial assistance.

## **Funding**

This study was supported by the Garland Initiative for Vision funded by the William K. Bowes Jr. Foundation.

## **Authors' relationships and activities**

The authors declare that there are no relationships or activities that might bias, or be perceived to be bias, their work.

## **Contribution statement**

JAT and HT designed the study; HT acquired the data; PJ analyzed and interpreted data; HT and PJ wrote the manuscript. All authors revised the manuscript and approved its final version. PJ is the guarantor of this work.

## References

1. IDF Diabetes Atlas [article online], 2019. Available from <https://www.diabetesatlas.org>.
2. Taylor KS, Heneghan CJ, Farmer AJ, Fuller AM, Adler AI, Aronson JK, Stevens RJ: All-Cause and Cardiovascular Mortality in Middle-Aged People With Type 2 Diabetes Compared With People Without Diabetes in a Large UK Primary Care Database. *Diabetes Care* 2013;36:2366-2371
3. Meigs JB, Cupples LA, Wilson PW: Parental transmission of type 2 diabetes: the Framingham Offspring Study. *Diabetes* 2000;49:2201-2207
4. Fuchsberger C, Flannick J, Teslovich TM, Mahajan A, Agarwala V, Gaulton KJ, Ma C, Fontanillas P, Moutsianas L, McCarthy DJ, Rivas MA, Perry JRB, Sim X, Blackwell TW, Robertson NR, Rayner NW, Cingolani P, Locke AE, Tajes JF, Highland HM, Dupuis J, Chines PS, Lindgren CM, Hartl C, Jackson AU, Chen H, Huyghe JR, van de Bunt M, Pearson RD, Kumar A, Muller-Nurasyid M, Grarup N, Stringham HM, Gamazon ER, Lee J, Chen Y, Scott RA, Below JE, Chen P, Huang J, Go MJ, Stitzel ML, Pasko D, Parker SCJ, Varga TV, Green T, Beer NL, Day-Williams AG, Ferreira T, Fingerlin T, Horikoshi M, Hu C, Huh I, Ikram MK, Kim BJ, Kim Y, Kim YJ, Kwon MS, Lee J, Lee S, Lin KH, Maxwell TJ, Nagai Y, Wang X, Welch RP, Yoon J, Zhang W, Barzilai N, Voight BF, Han BG, Jenkinson CP, Kuulasmaa T, Kuusisto J, Manning A, Ng MCY, Palmer ND, Balkau B, Stancakova A, Abboud HE, Boeing H, Giedraitis V, Prabhakaran D, Gottesman O, Scott J, Carey J, Kwan P, Grant G, Smith JD, Neale BM, Purcell S, Butterworth AS, Howson JMM, Lee HM, Lu Y, Kwak SH, Zhao W, Danesh J, Lam VKL, Park KS, Saleheen D, So WY, Tam CHT, Afzal U, Aguilar D, Arya R, Aung T, Chan E, Navarro C, Cheng CY, Palli D, Correa A, Curran JE, Rybin D, Farook VS, Fowler SP, Freedman BI, Griswold M, Hale DE, Hicks PJ, Khor CC, Kumar S, Lehne B, Thuillier D, Lim WY, Liu J, van der Schouw YT, Loh M, Musani SK, Puppala S, Scott WR, Yengo L, Tan ST, Taylor HA, Jr.,

Thameem F, Wilson G, Sr., Wong TY, Njolstad PR, Levy JC, Mangino M, Bonnycastle LL, Schwarzmayr T, Fadista J, Surdulescu GL, Herder C, Groves CJ, Wieland T, Bork-Jensen J, Brandslund I, Christensen C, Koistinen HA, Doney ASF, Kinnunen L, Esko T, Farmer AJ, Hakaste L, Hodgkiss D, Kravic J, Lyssenko V, Hollensted M, Jorgensen ME, Jorgensen T, Ladenvall C, Justesen JM, Karajamaki A, Kriebel J, Rathmann W, Lannfelt L, Lauritzen T, Narisu N, Linneberg A, Melander O, Milani L, Neville M, Orho-Melander M, Qi L, Qi Q, Roden M, Rolandsson O, Swift A, Rosengren AH, Stirrups K, Wood AR, Mihailov E, Blancher C, Carneiro MO, Maguire J, Poplin R, Shakir K, Fennell T, DePristo M, de Angelis MH, Deloukas P, Gjesing AP, Jun G, Nilsson P, Murphy J, Onofrio R, Thorand B, Hansen T, Meisinger C, Hu FB, Isomaa B, Karpe F, Liang L, Peters A, Huth C, O'Rahilly SP, Palmer CNA, Pedersen O, Rauramaa R, Tuomilehto J, Salomaa V, Watanabe RM, Syvanen AC, Bergman RN, Bharadwaj D, Bottinger EP, Cho YS, Chandak GR, Chan JCN, Chia KS, Daly MJ, Ebrahim SB, Langenberg C, Elliott P, Jablonski KA, Lehman DM, Jia W, Ma RCW, Pollin TI, Sandhu M, Tandon N, Froguel P, Barroso I, Teo YY, Zeggini E, Loos RJF, Small KS, Ried JS, DeFronzo RA, Grallert H, Glaser B, Metspalu A, Wareham NJ, Walker M, Banks E, Gieger C, Ingelsson E, Im HK, Illig T, Franks PW, Buck G, Trakalo J, Buck D, Prokopenko I, Magi R, Lind L, Farjoun Y, Owen KR, Gloyn AL, Strauch K, Tuomi T, Kooner JS, Lee JY, Park T, Donnelly P, Morris AD, Hattersley AT, Bowden DW, Collins FS, Atzmon G, Chambers JC, Spector TD, Laakso M, Strom TM, Bell GI, Blangero J, Duggirala R, Tai ES, McVean G, Hanis CL, Wilson JG, Seielstad M, Frayling TM, Meigs JB, Cox NJ, Sladek R, Lander ES, Gabriel S, Burt NP, Mohlke KL, Meitinger T, Groop L, Abecasis G, Florez JC, Scott LJ, Morris AP, Kang HM, Boehnke M, Altshuler D, McCarthy MI: The genetic architecture of type 2 diabetes. *Nature* 2016;536:41-47

5. Prasad RB, Groop L: Genetics of Type 2 Diabetes-Pitfalls and Possibilities. *Genes-Basel* 2015;6:87-123
6. McNaughton SA, Mishra GD, Brunner EJ: Dietary patterns, insulin resistance, and incidence of type 2 diabetes in the Whitehall II Study. *Diabetes Care* 2008;31:1343-1348
7. Odegaard AO, Koh WP, Butler LM, Duval S, Gross MD, Yu MC, Yuan JM, Pereira MA: Dietary patterns and incident type 2 diabetes in chinese men and women: the singapore chinese health study. *Diabetes Care* 2011;34:880-885
8. Gluckman PD, Cutfield W, Hofman P, Hanson MA: The fetal, neonatal, and infant environments-the long-term consequences for disease risk. *Early Hum Dev* 2005;81:51-59
9. Tay J, Thompson CH, Luscombe-Marsh ND, Wycherley TP, Noakes M, Buckley JD, Wittert GA, Yancy WS, Jr., Brinkworth GD: Effects of an energy-restricted low-carbohydrate, high unsaturated fat/low saturated fat diet versus a high-carbohydrate, low-fat diet in type 2 diabetes: A 2-year randomized clinical trial. *Diabetes Obes Metab* 2018;20:858-871
10. van Zuuren EJ, Fedorowicz Z, Kuijpers T, Pijl H: Effects of low-carbohydrate- compared with low-fat-diet interventions on metabolic control in people with type 2 diabetes: a systematic review including GRADE assessments. *Am J Clin Nutr* 2018;108:300-331
11. Weickert MO, Pfeiffer AFH: Impact of Dietary Fiber Consumption on Insulin Resistance and the Prevention of Type 2 Diabetes. *J Nutr* 2018;148:7-12
12. Hales CN, Barker DJP, Clark PMS, Cox LJ, Fall C, Osmond C, Winter PD: Fetal and Infant Growth and Impaired Glucose-Tolerance at Age 64. *Bmj-Brit Med J* 1991;303:1019-1022



13. Hales CN, Barker DJ: Type 2 (non-insulin-dependent) diabetes mellitus: the thrifty phenotype hypothesis. *Diabetologia* 1992;35:595-601
14. Schulz LC: The Dutch Hunger Winter and the developmental origins of health and disease. *Proc Natl Acad Sci U S A* 2010;107:16757-16758
15. Bateson P, Gluckman P, Hanson M: The biology of developmental plasticity and the Predictive Adaptive Response hypothesis. *J Physiol* 2014;592:2357-2368
16. Petry CJ, Dorling MW, Pawlak DB, Ozanne SE, Hales CN: Diabetes in old male offspring of rat dams fed a reduced protein diet. *Int J Exp Diabetes Res* 2001;2:139-143
17. Swanson AM, David AL: Animal models of fetal growth restriction: Considerations for translational medicine. *Placenta* 2015;36:623-630
18. Zambrano E, Bautista CJ, Deas M, Martinez-Samayoa PM, Gonzalez-Zamorano M, Ledesma H, Morales J, Larrea F, Nathanielsz PW: A low maternal protein diet during pregnancy and lactation has sex- and window of exposure-specific effects on offspring growth and food intake, glucose metabolism and serum leptin in the rat. *J Physiol-London* 2006;571:221-230
19. Kereliuk SM, Brawerman GM, Dolinsky VW: Maternal Macronutrient Consumption and the Developmental Origins of Metabolic Disease in the Offspring. *Int J Mol Sci* 2017;18
20. McElhinny TL, Smale L, Holekamp KE: Patterns of body temperature, activity, and reproductive behavior in a tropical murid rodent, *Arvicanthis niloticus*. *Physiol Behav* 1997;62:91-96

21. Yang K, Gotzmann J, Kuny S, Huang H, Sauve Y, Chan CB: Five stages of progressive beta-cell dysfunction in the laboratory Nile rat model of type 2 diabetes. *J Endocrinol* 2016;229:343-356
22. Subramaniam A, Landstrom M, Luu A, Hayes KC: The Nile Rat (*Arvicanthis niloticus*) as a Superior Carbohydrate-Sensitive Model for Type 2 Diabetes Mellitus (T2DM). *Nutrients* 2018;10
23. Chaabo F, Pronczuk A, Maslova E, Hayes K: Nutritional correlates and dynamics of diabetes in the Nile rat (*Arvicanthis niloticus*): a novel model for diet-induced type 2 diabetes and the metabolic syndrome. *Nutr Metab (Lond)* 2010;7:29
24. Subramaniam A, Landstrom M, Hayes KC: Genetic Permissiveness and Dietary Glycemic Load Interact to Predict Type-II Diabetes in the Nile rat (*Arvicanthis niloticus*). *Nutrients* 2019;11
25. Senzota RBM: A Case of Rodent - Ungulate Resource Partitioning. *J Mammal* 1983;64:326-329
26. Toh H, Smolentsev A, Bozadjian RV, Keeley PW, Lockwood MD, Sadjadi R, Clegg DO, Blodi BA, Coffey PJ, Reese BE, Thomson JA: Vascular changes in diabetic retinopathy-a longitudinal study in the Nile rat. *Lab Invest* 2019;
27. Ferland-McCollough D, Fernandez-Twinn DS, Cannell IG, David H, Warner M, Vaag AA, Bork-Jensen J, Brons C, Gant TW, Willis AE, Siddle K, Bushell M, Ozanne SE: Programming of adipose tissue miR-483-3p and GDF-3 expression by maternal diet in type 2 diabetes. *Cell Death Differ* 2012;19:1003-1012
28. Bertram C, Trowern AR, Copin N, Jackson AA, Whorwood CB: The maternal diet during pregnancy programs altered expression of the glucocorticoid receptor and type 2 11beta-

hydroxysteroid dehydrogenase: potential molecular mechanisms underlying the programming of hypertension in utero. *Endocrinology* 2001;142:2841-2853

29. Geer EB, Shen W: Gender differences in insulin resistance, body composition, and energy balance. *Gend Med* 2009;6 Suppl 1:60-75

30. Logue J, Walker JJ, Colhoun HM, Leese GP, Lindsay RS, McKnight JA, Morris AD, Pearson DW, Petrie JR, Philip S, Wild SH, Sattar N, Network SDR: Do men develop type 2 diabetes at lower body mass indices than women? *Diabetologia* 2011;54:3003-3006

31. Bolsinger J, Landstrom M, Pronczuk A, Auerbach A, Hayes KC: Low glycemic load diets protect against metabolic syndrome and Type 2 diabetes mellitus in the male Nile rat. *J Nutr Biochem* 2017;42:134-148

32. Needham CJ, Bradford JR, Bulpitt AJ, Westhead DR: A primer on learning in Bayesian networks for computational biology. *PLoS Comput Biol* 2007;3:e129

33. Scutari M: Learning Bayesian Networks with the bnlearn R Package. *J Stat Softw* 2010;35

34. When are mice considered old? [article online], 2017. Available from

<https://www.jax.org/news-and-insights/jax-blog/2017/november/when-are-mice-considered-old#>.

35. Reynolds A, Mann J, Cummings J, Winter N, Mete E, Te Morenga L: Carbohydrate quality and human health: a series of systematic reviews and meta-analyses (vol 393, pg 434, 2019). *Lancet* 2019;393:406-406

36. Zhao L, Zhang F, Ding X, Wu G, Lam YY, Wang X, Fu H, Xue X, Lu C, Ma J, Yu L, Xu C, Ren Z, Xu Y, Xu S, Shen H, Zhu X, Shi Y, Shen Q, Dong W, Liu R, Ling Y, Zeng Y, Wang X, Zhang Q, Wang J, Wang L, Wu Y, Zeng B, Wei H, Zhang M, Peng Y, Zhang C: Gut bacteria selectively promoted by dietary fibers alleviate type 2 diabetes. *Science* 2018;359:1151-1156
37. Vaiserman AM: Early-Life Nutritional Programming of Type 2 Diabetes: Experimental and Quasi-Experimental Evidence. *Nutrients* 2017;9
38. Hayward AD, Lummaa V: Testing the evolutionary basis of the predictive adaptive response hypothesis in a preindustrial human population. *Evol Med Public Health* 2013;2013:106-117

## Figure legends

### Figure 1: Maternal High Fiber Diet Protects Offspring on Diabetogenic Diet

The progression of diabetes in the Nile rat offspring (both sexes) fed a diabetogenic diet is depicted as a series of random blood glucose levels from 4 to 40 weeks old. The offspring of mothers with a high fiber diet, on average, experienced a delayed onset of diabetes and progressed more gradually to higher levels of RBG compared to offspring of mothers with a diabetogenic diet. The error bars reflect a 95% confidence interval of the data.

### Figure 2: Maternal Diet Does Not Influence Offspring on High Fiber Diet

The progression of diabetes in the Nile rat offspring (both sexes) fed a high fiber diet is depicted as a series of random blood glucose levels from 4 to 40 weeks old. When the offspring were fed a high fiber diet, they do not develop diabetes neither from mothers with a high fiber diet nor from mothers with a diabetogenic diet. The error bars reflect a 95% confidence interval of the data.

Figure 3: The Decrease of RBG Trajectory from a Maternal High Fiber Diet was More Obvious in the Male Offspring

A. In male offspring on diabetogenic diet, the protective effect from a maternal high fiber diet was evident from 12 to 40 weeks old. B. In female offspring on diabetogenic diet, the protective effect from a maternal high fiber diet was evident from 24 to 40 weeks old. The error bars reflect a 95% confidence interval of the data.

Figure 4: Offspring Have a Reduced Probability of Diabetes When Mothers Consumed a High Fiber Diet. We used a simple Bayesian network that incorporated maternal diet, offspring diet and sex to calculate the probability of diabetes due to maternal diet differences. When the offspring is on diabetogenic diet, the probability of diabetes is much reduced in the group with a maternal high fiber diet compared to a maternal diabetogenic diet.

Figure 5: The Probability of Diabetes Due to Maternal Diet was Reduced to a Larger Extent in the Male Offspring

A. In male offspring on diabetogenic diet, the ones from mothers on a high fiber diet experienced a reduced probability of diabetes from 8 to 40 weeks old. B. In female offspring on diabetogenic diet, the ones from mothers on a high fiber diet experienced a reduced probability from 25 to 40 weeks old.

Figure 1

## Offspring on Diabetogenic Diet

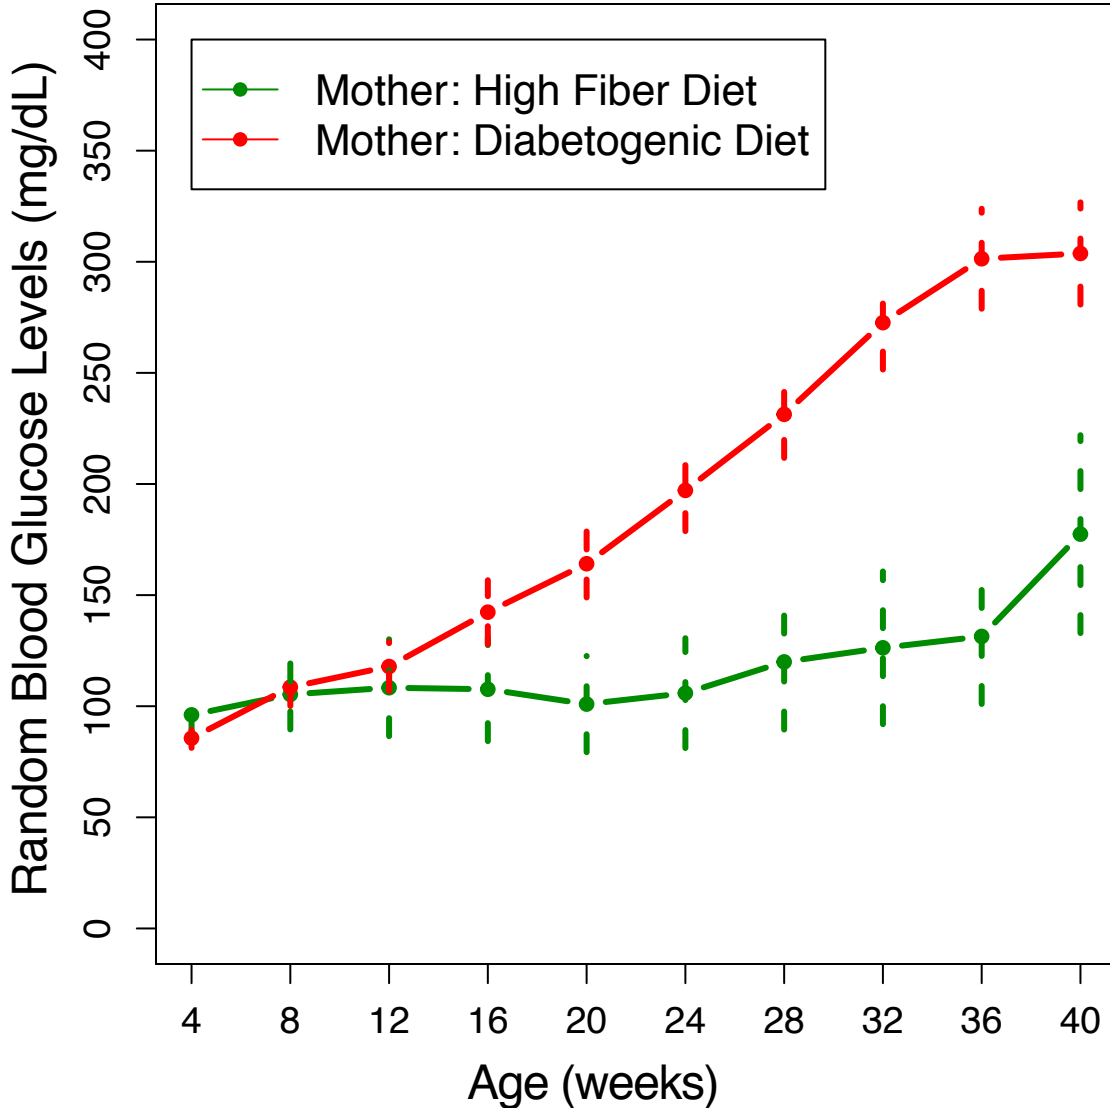

Figure 2

## Offspring on High Fiber Diet

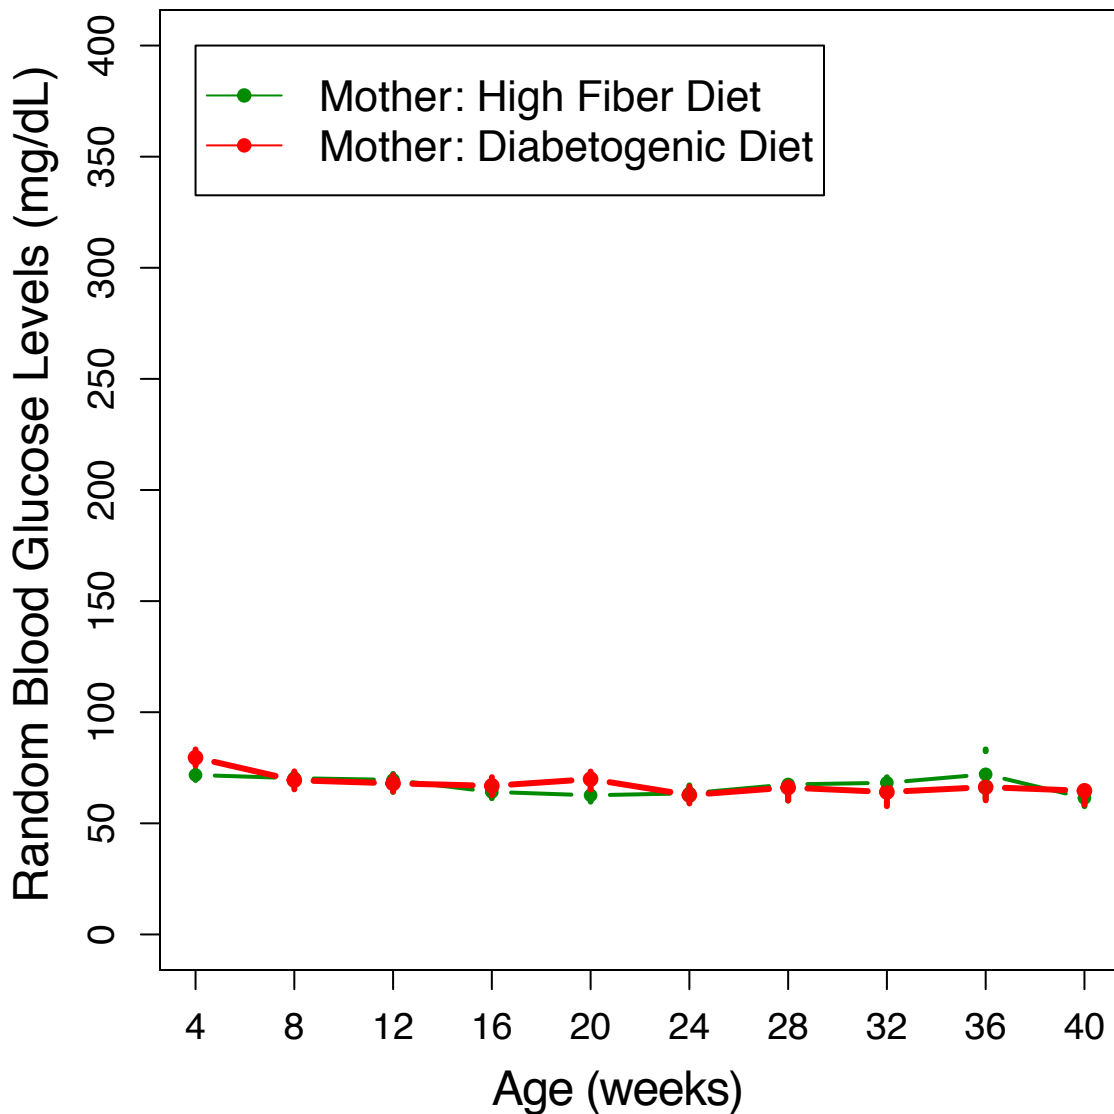



Figure 3

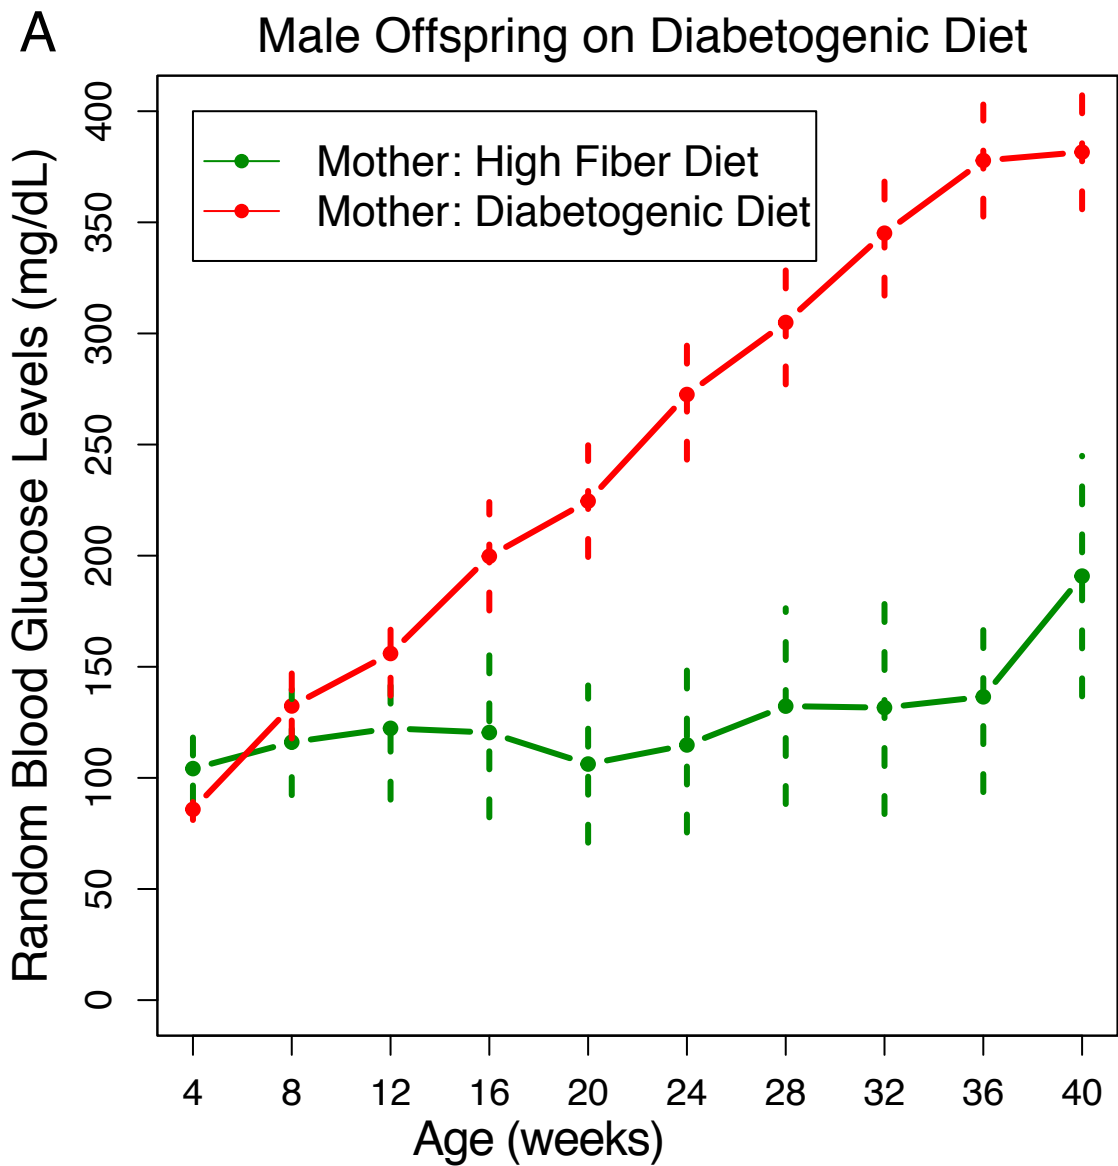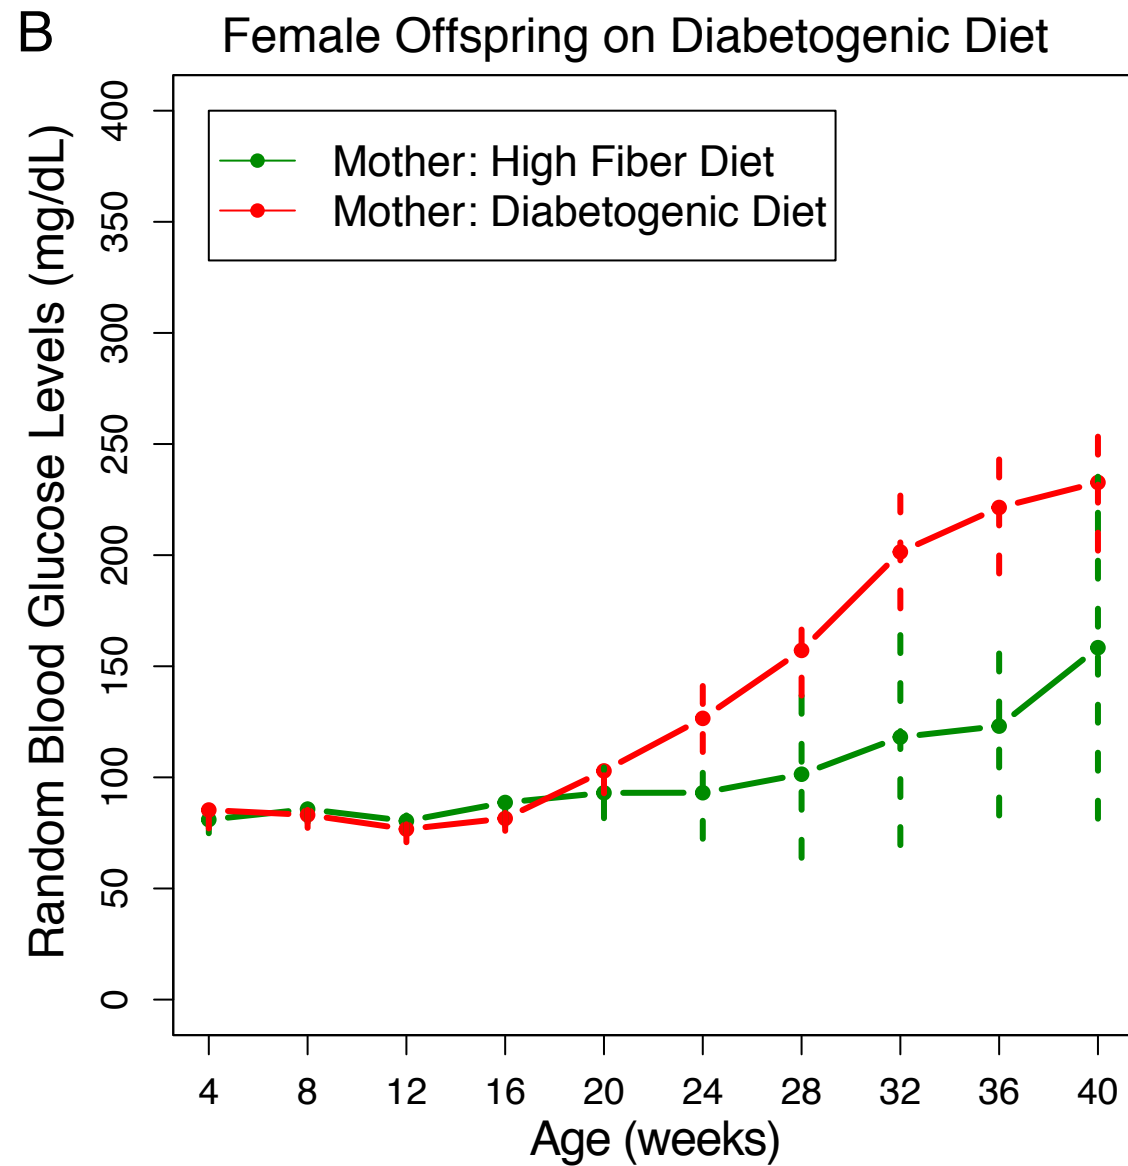

Figure 4

# Human Age Equivalent (Years)

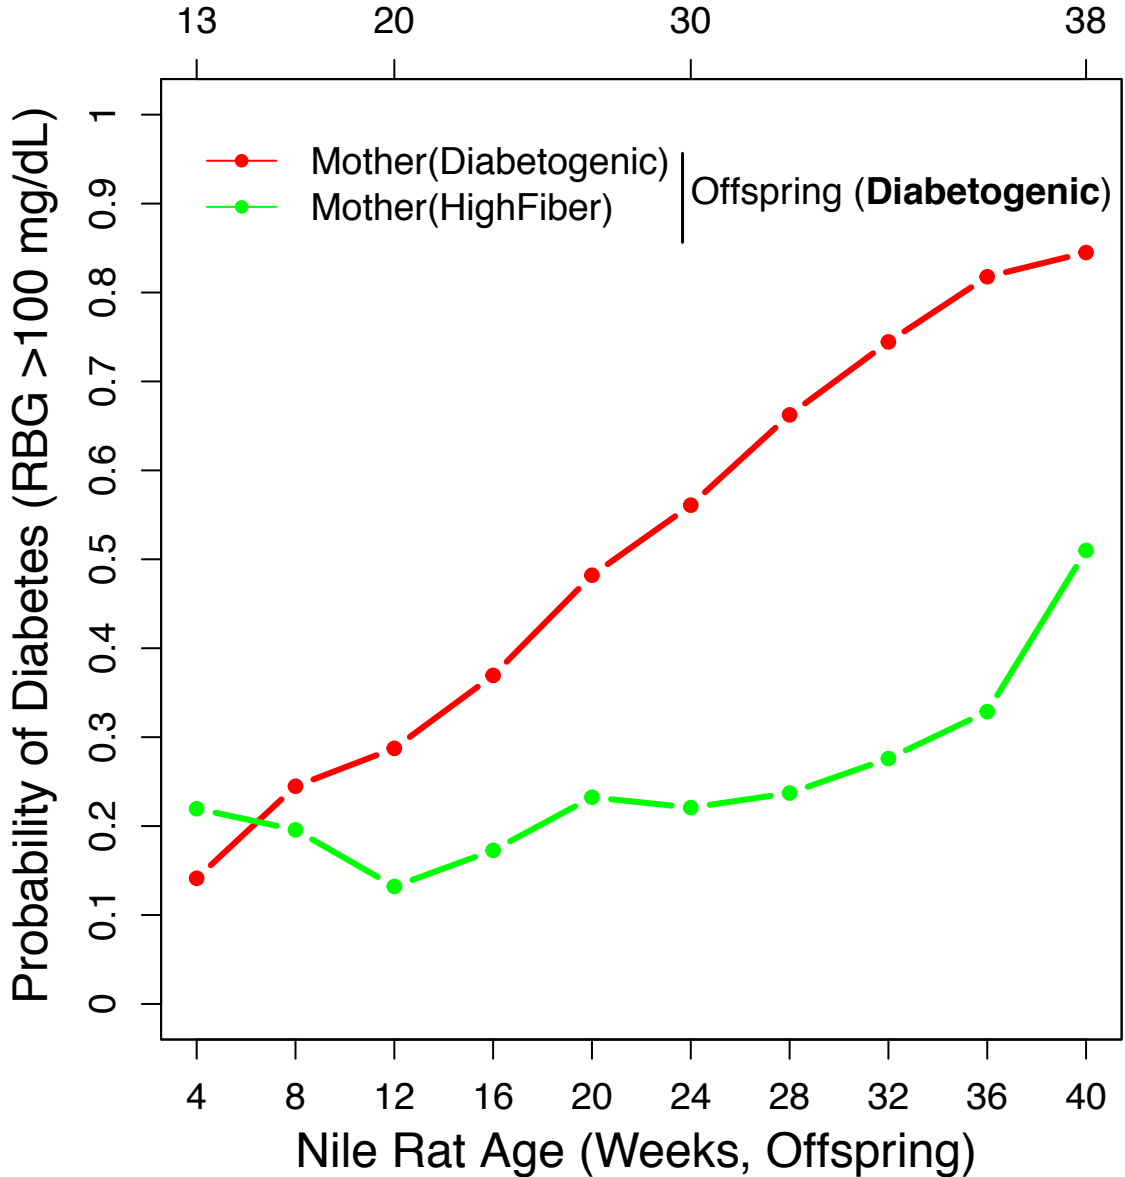

Figure 5

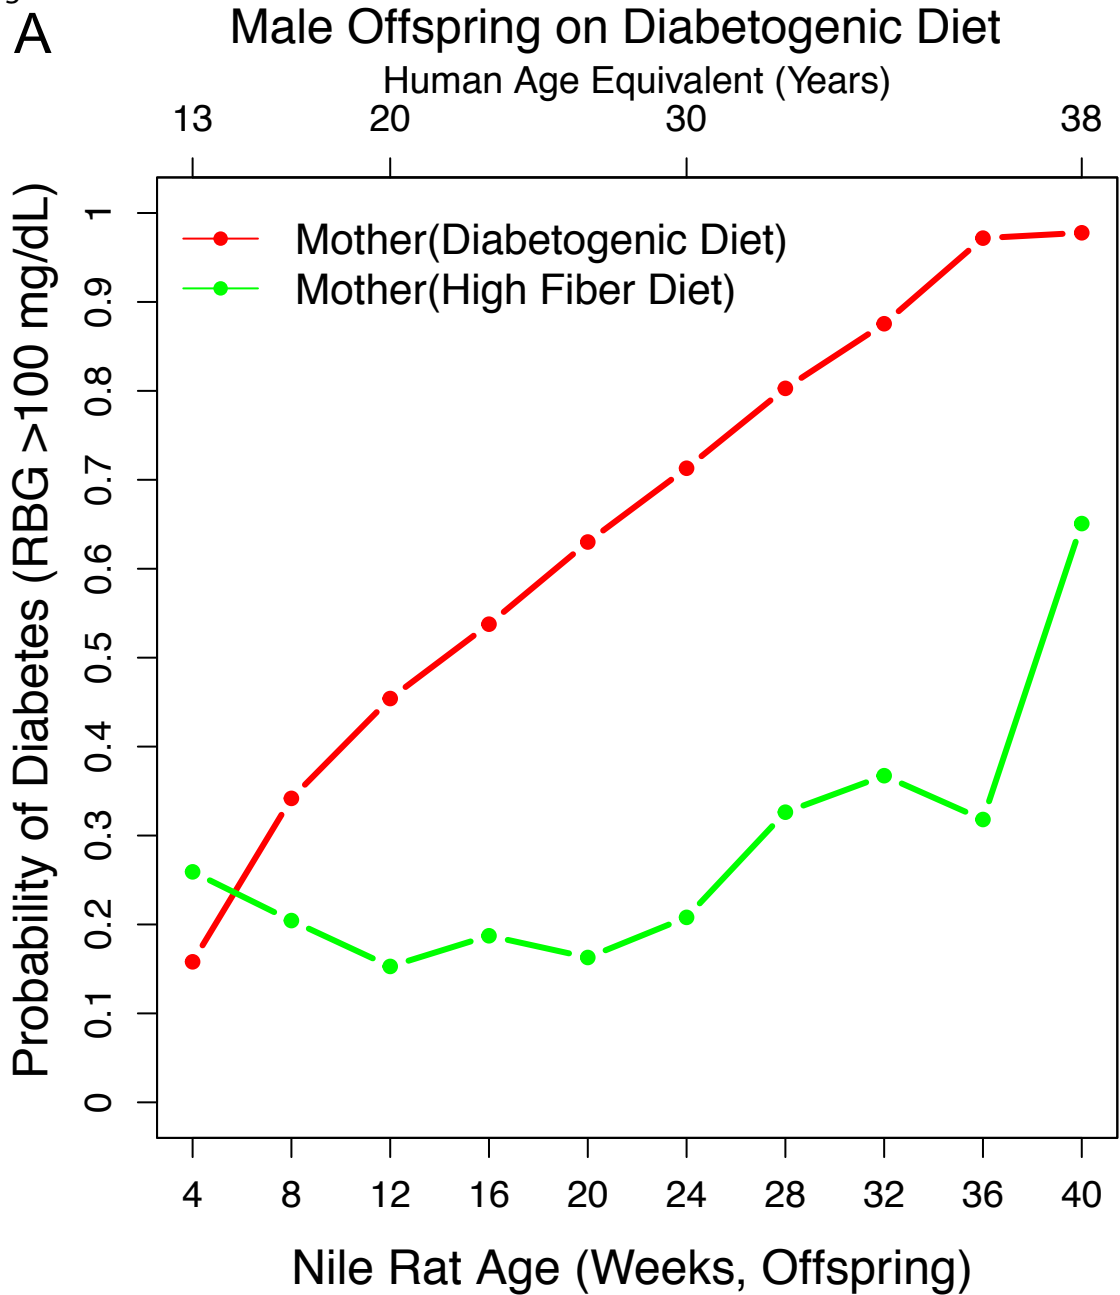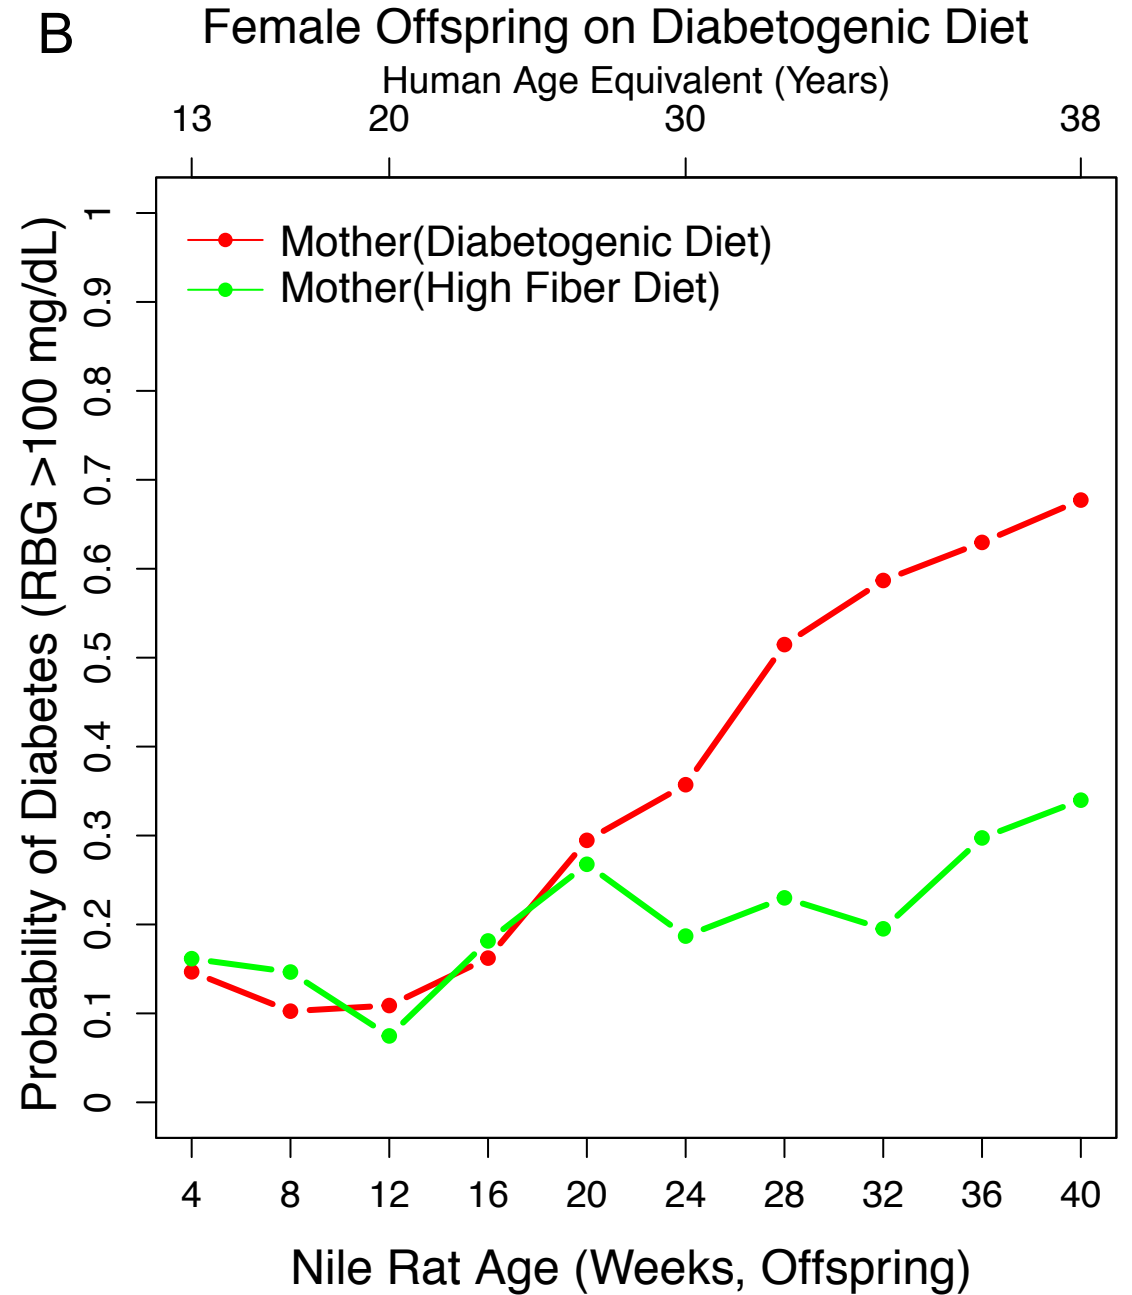

Source: https://www.biorxiv.org/content/10.1101/2020.09.26.315069v2.full.pdf
