# Supplementary material for: Maternal High Fiber Diet Protects Offspring Against Type 2 Diabetes
Source: bioRxiv or medRxiv preprint supplement (doi:10.1101/2020.09.26.315069), 2020-10-15

Figure S1

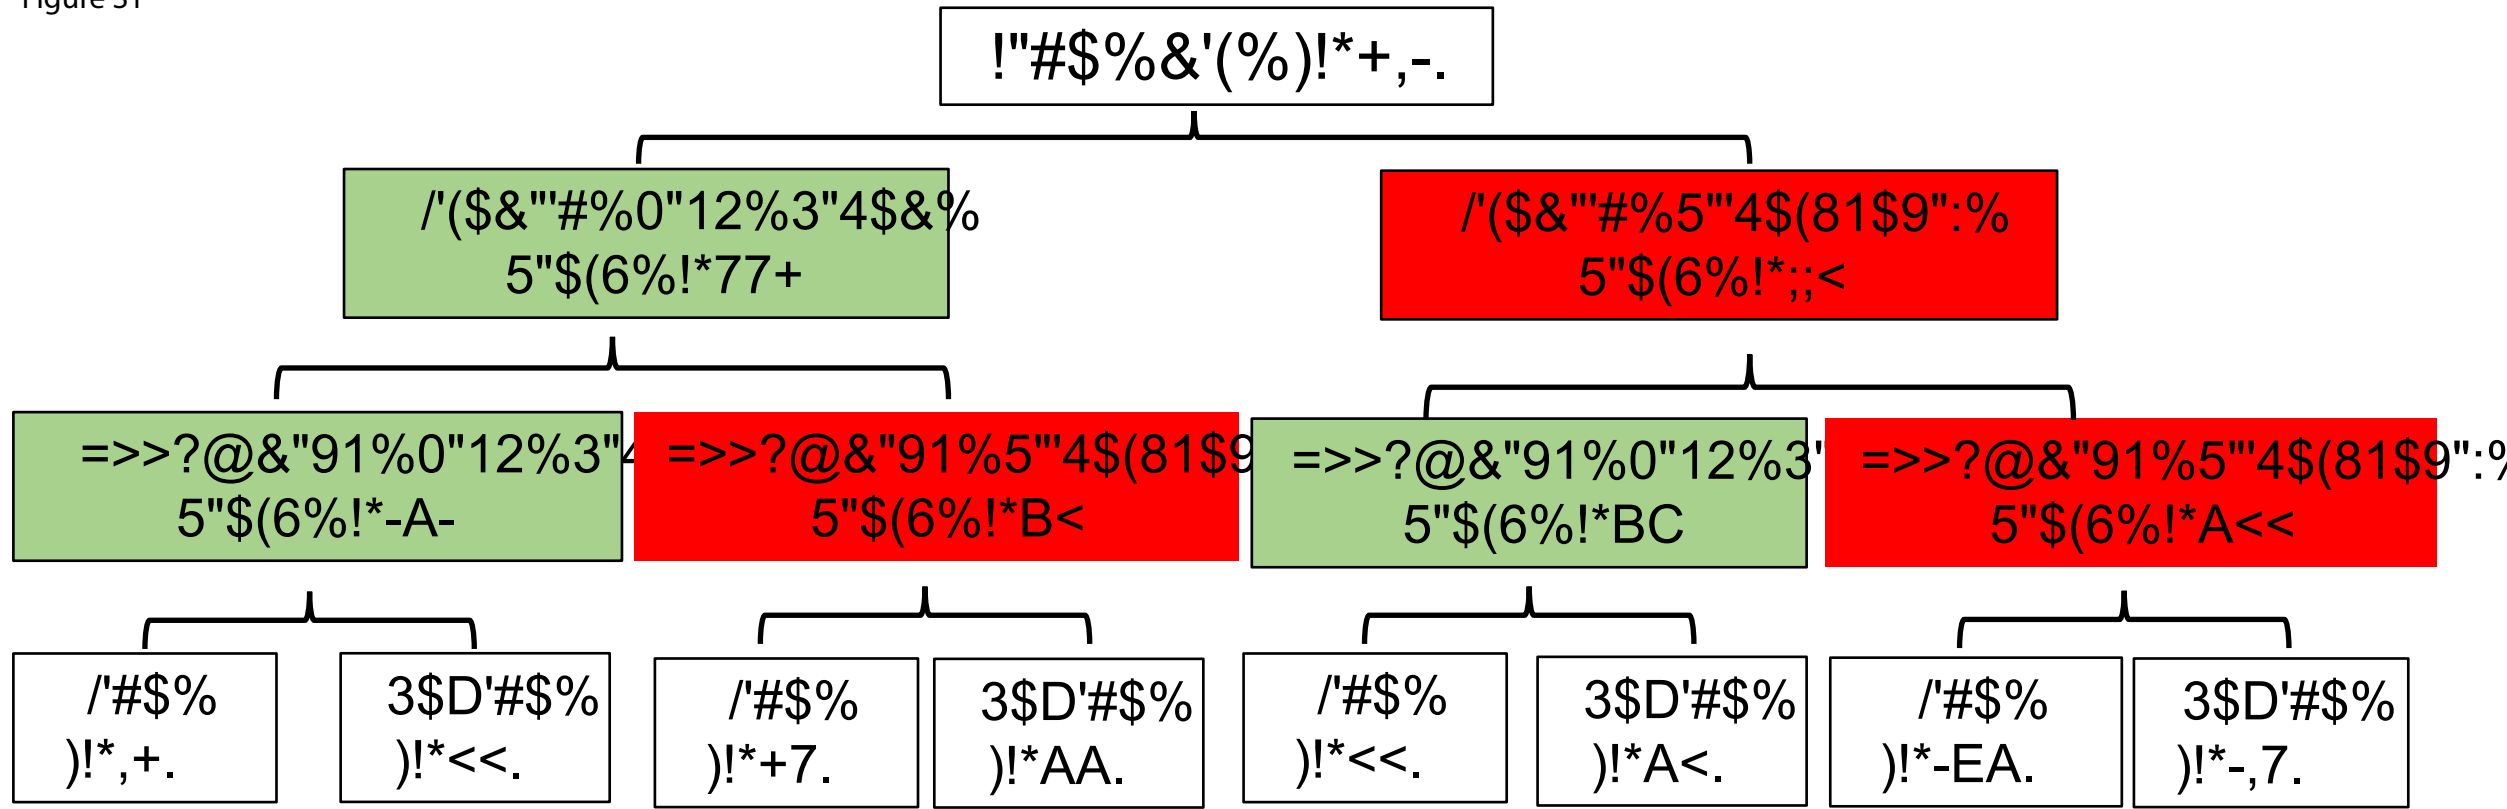

Supplement: Supplementary file [file media-1.pdf]
