# Supplementary material for: Maternal High Fiber Diet Protects Offspring Against Type 2 Diabetes
Source: bioRxiv or medRxiv preprint supplement (doi:10.1101/2020.09.26.315069), 2020-10-15

Figure S3

### A Male Offspring on High Fiber Diet

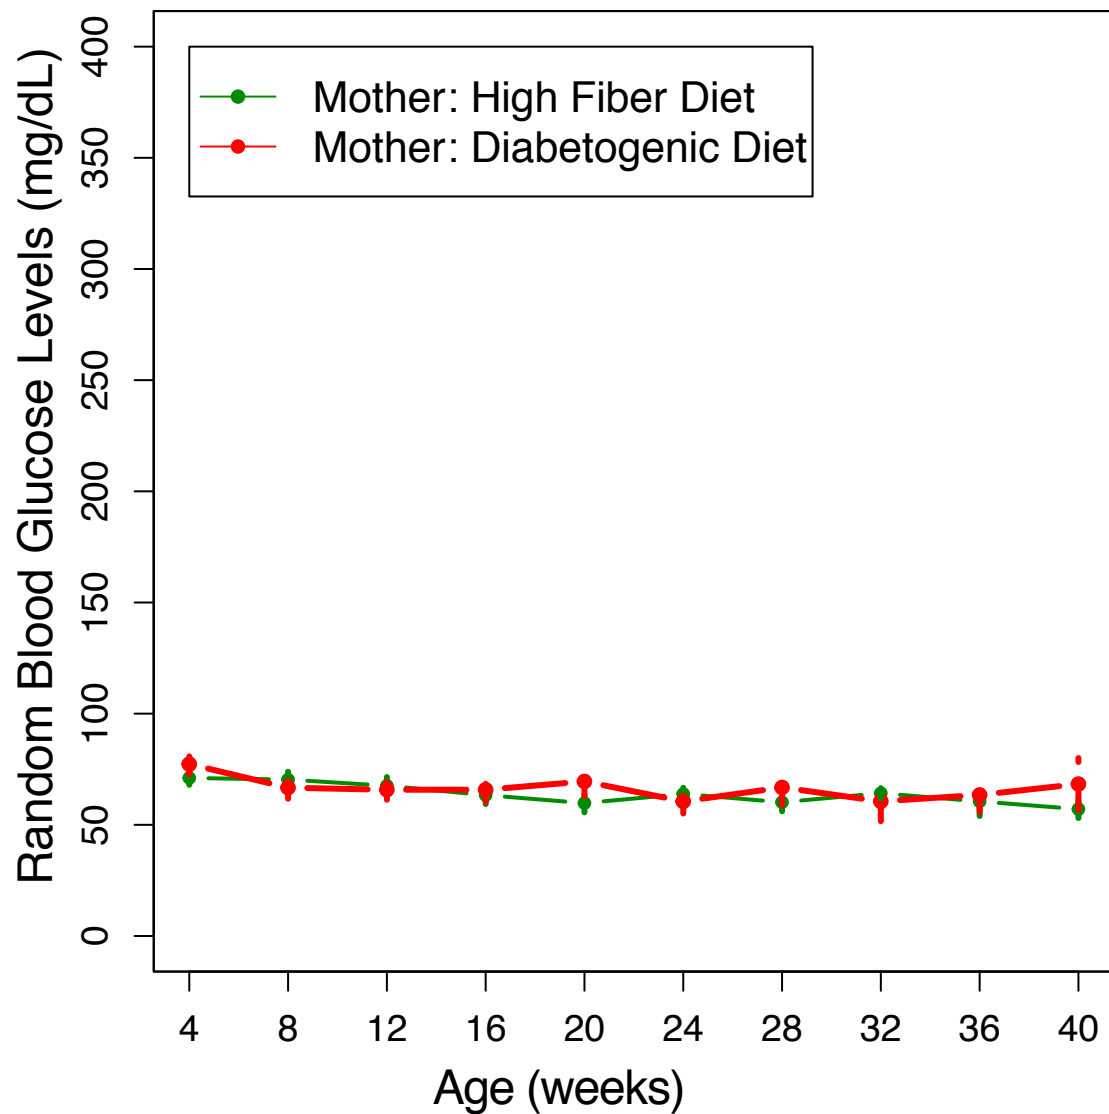

### B Female Offspring on High Fiber Diet

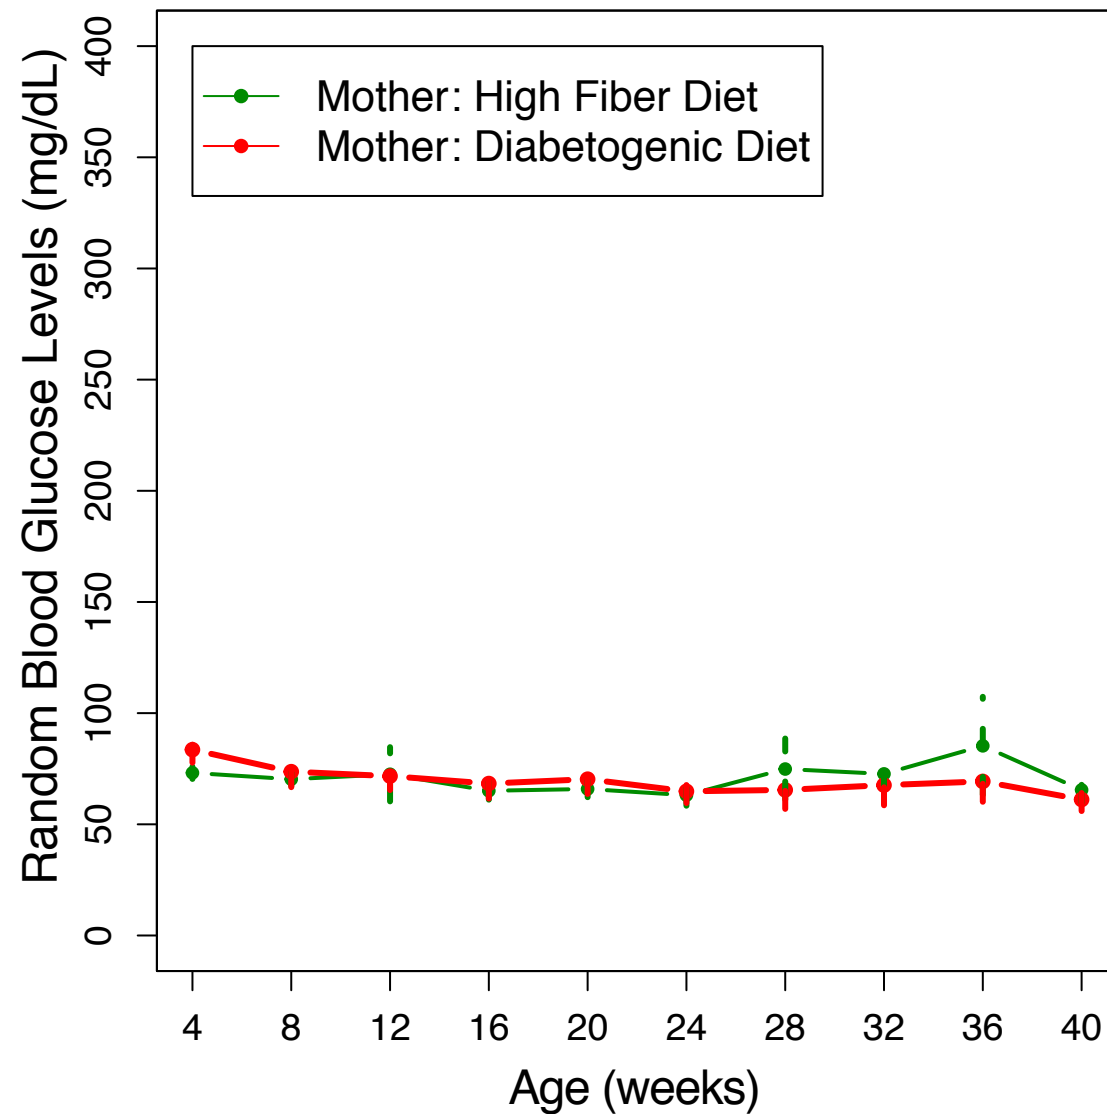

Supplement: Supplementary file [file media-3.pdf]
